# Supplementary material
Source: Research Square preprint supplement (doi:10.21203/rs.3.rs-9371317/v1)
Supplement: Supplementary file 1 [file 99452b58fd74120ee9f83e51.docx]

**Appendix**

Kimberlite occurrences are confined to Archean–Proterozoic cratons worldwide (Figure 3).

**
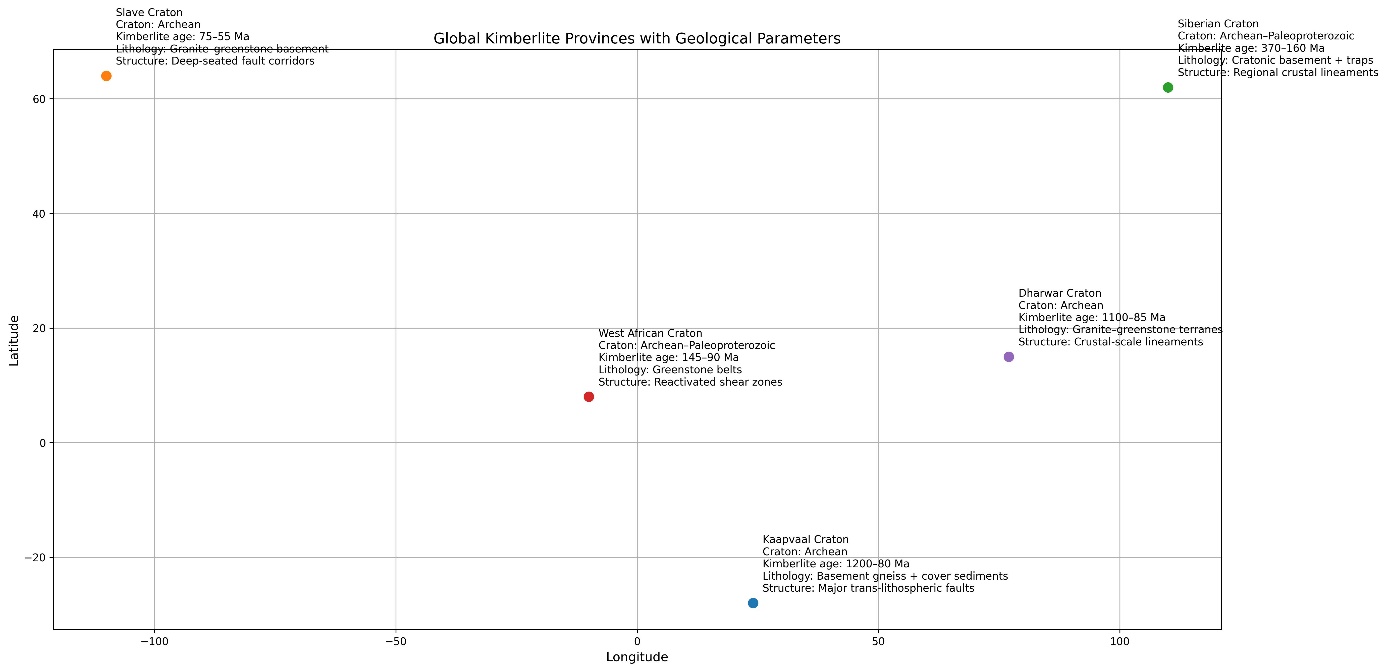
**

Figure 3.The global distribution of major kimberlite provinces is compiled from published syntheses (e.g., Gittins, 1996; Tappe et al., 2018; Kjarsgaard et al., 2019; Giuliani et al., 2023).
